# Supplementary material
Source: PubMed Central journal article supplement (PMC7707089)

### Supporting Files (Western blot) - Figure 3D

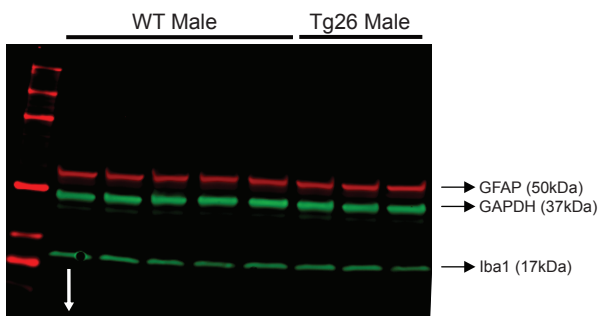

Note: Iba1 band from Lane 2 is excluded from analysis (air bubble).  
GFAP data (red bands) is not presented in the main figures.

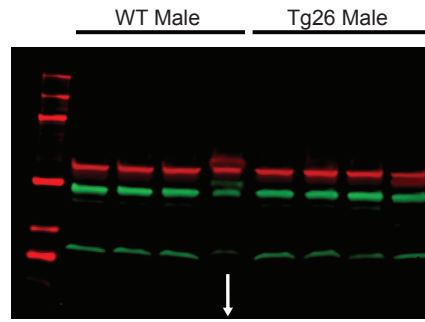

Note: Iba1 band from Lane 5 is excluded from data analysis.  
GFAP data (red bands) is not presented in the main figures.

### Supporting Files (Western blot) - Figure 4G

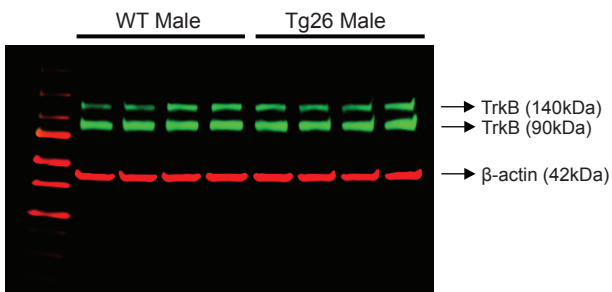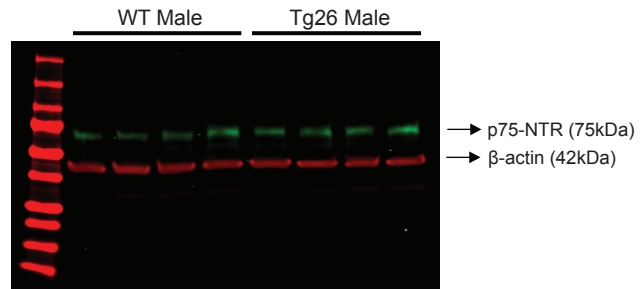

### Supporting Files (Western blot) - Figure 5A

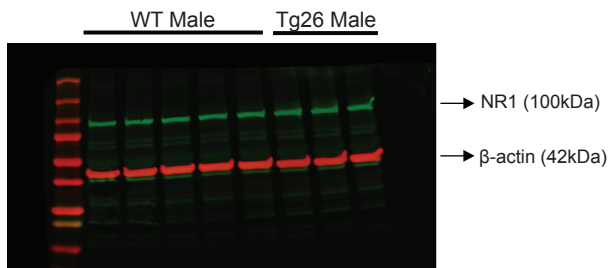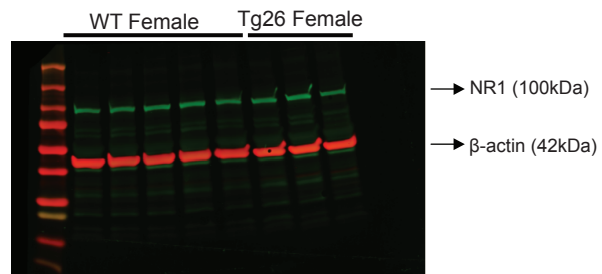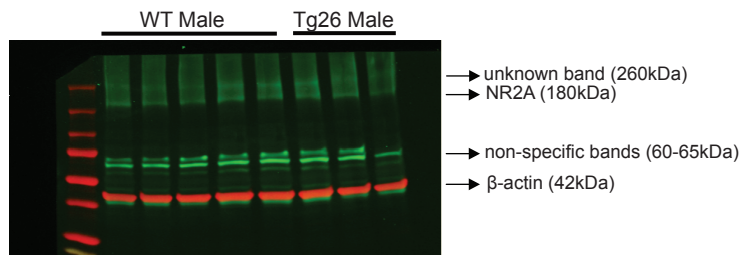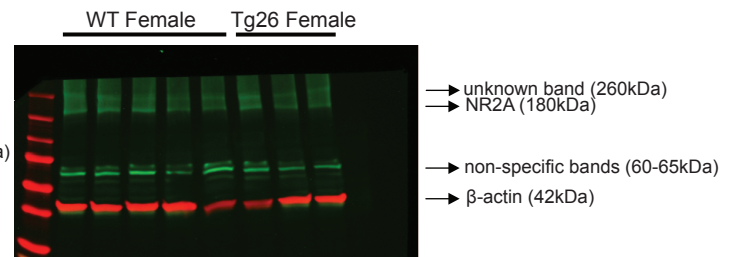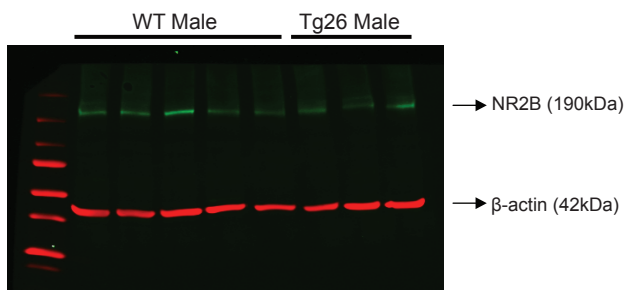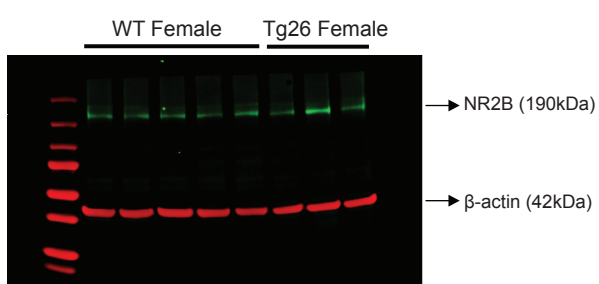

Supporting Files (Western blot) - Figure 5A

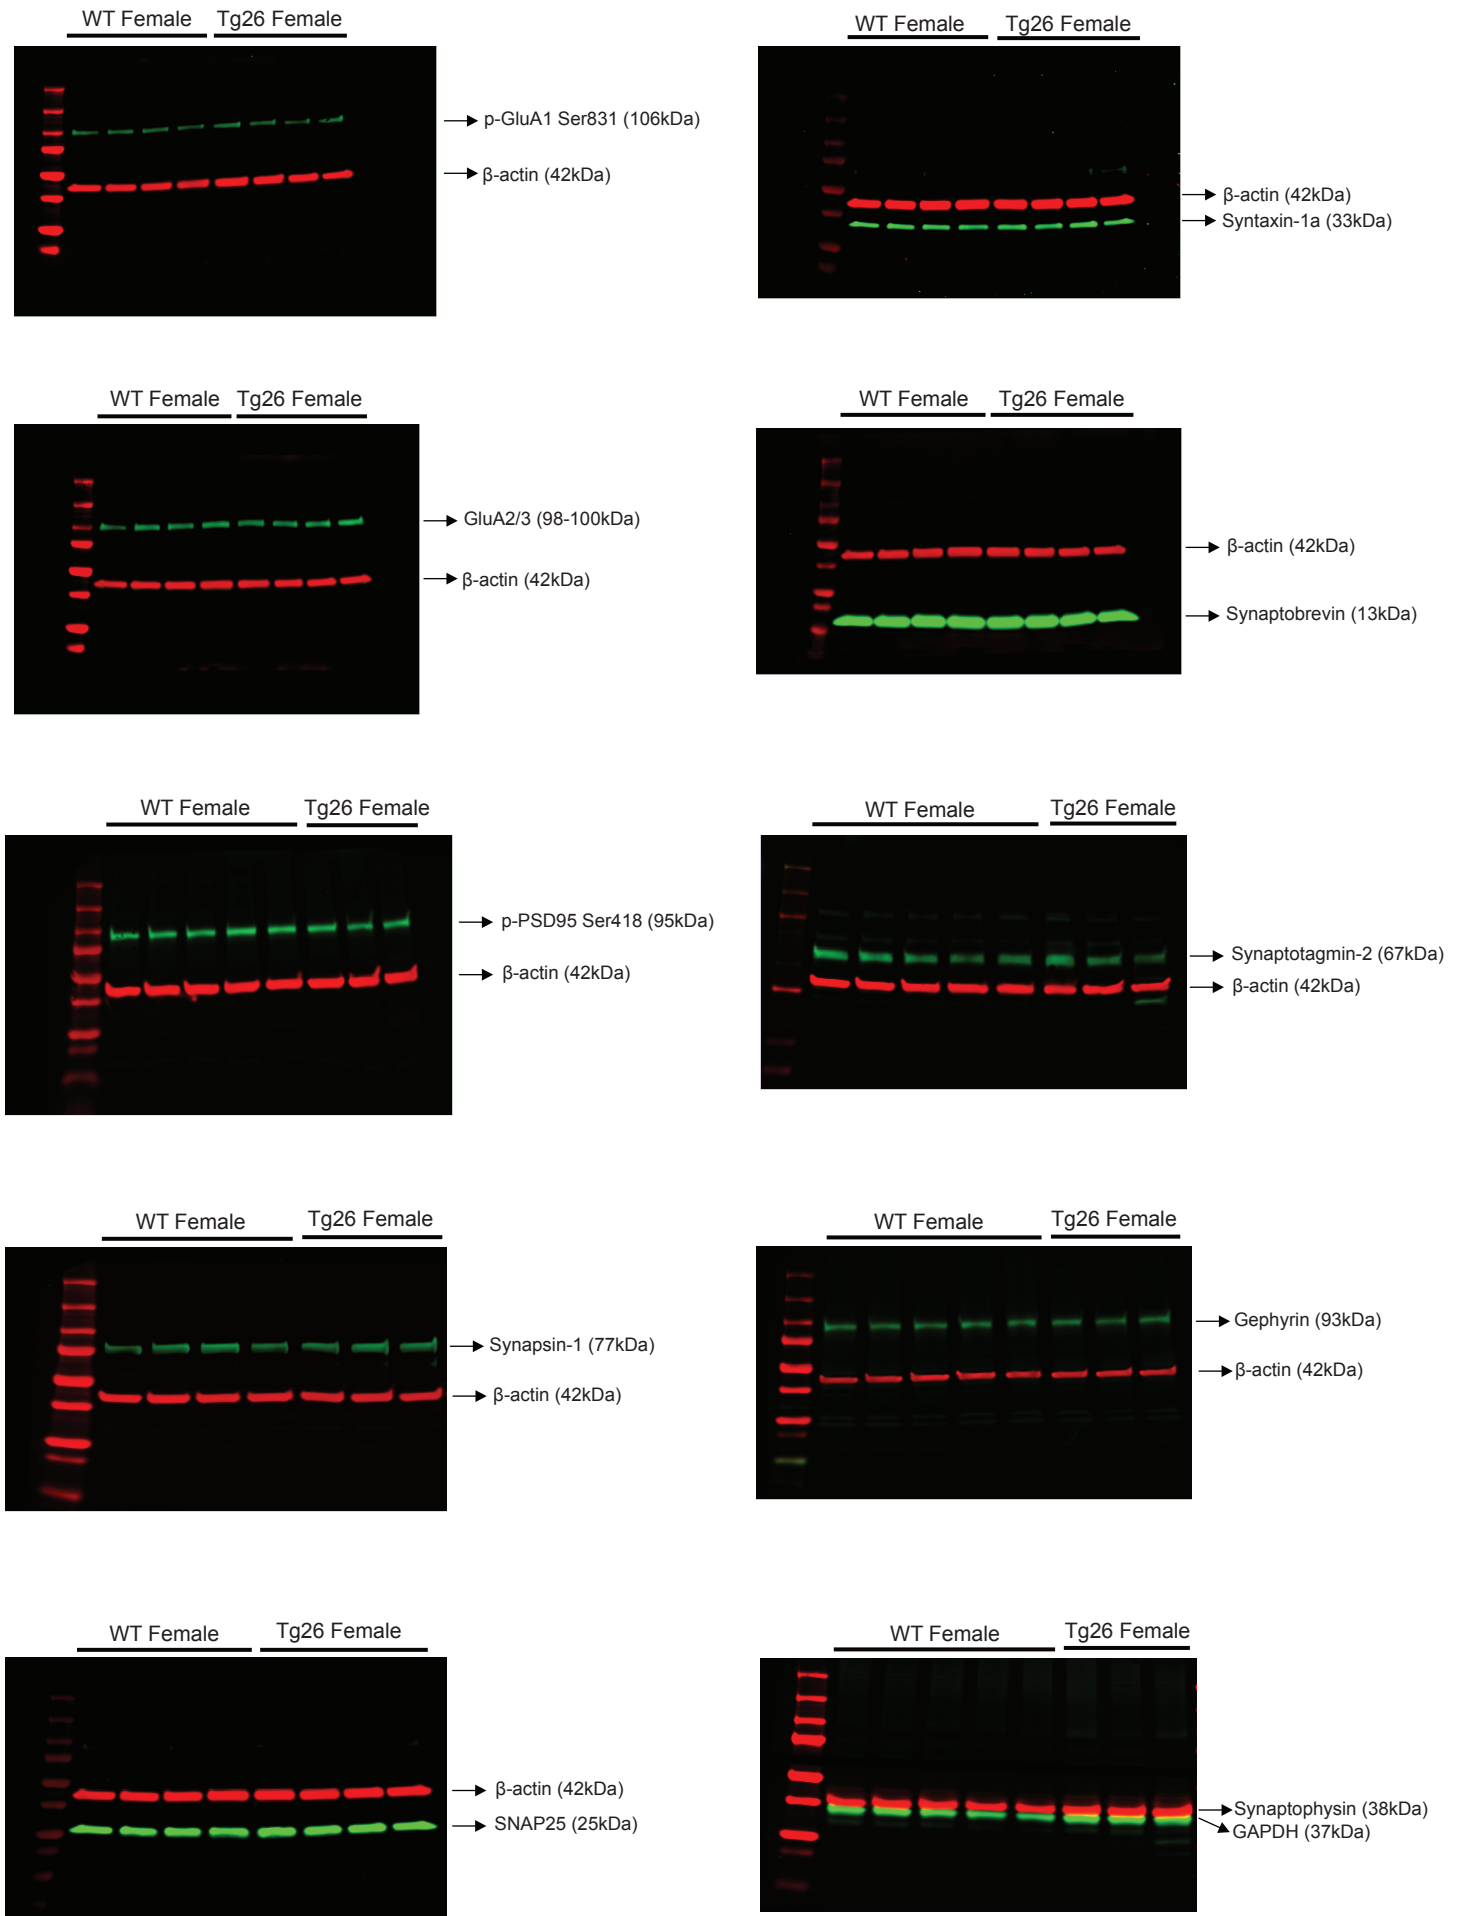

Supporting Files (Western blot) - Figure 5A

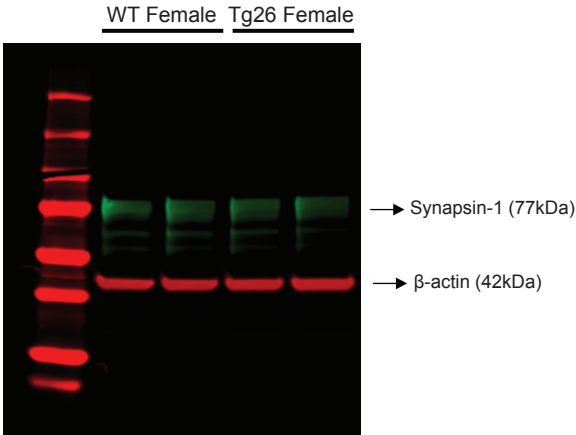

Supporting Files (Western blot) - Figure 5A

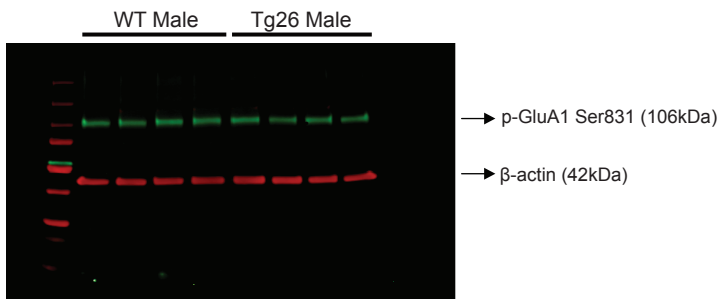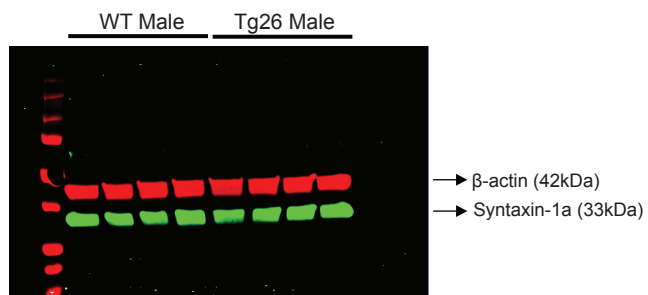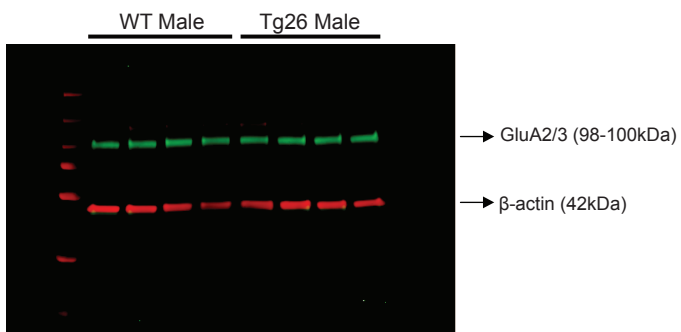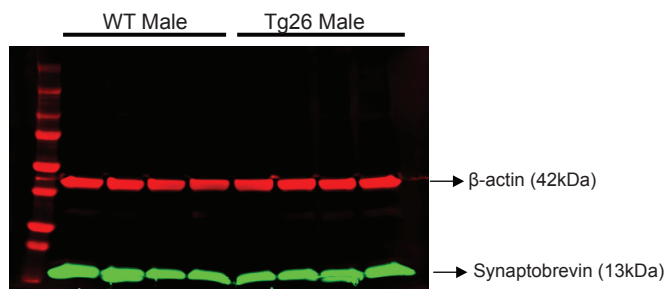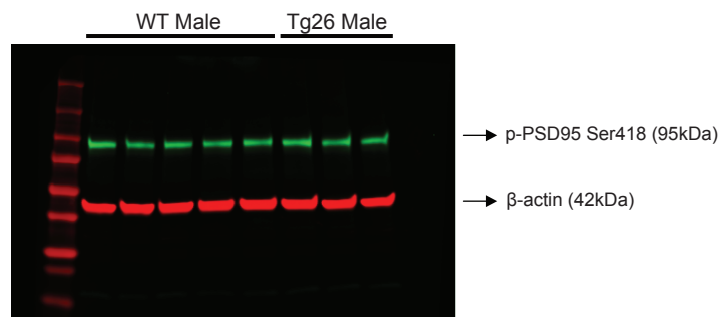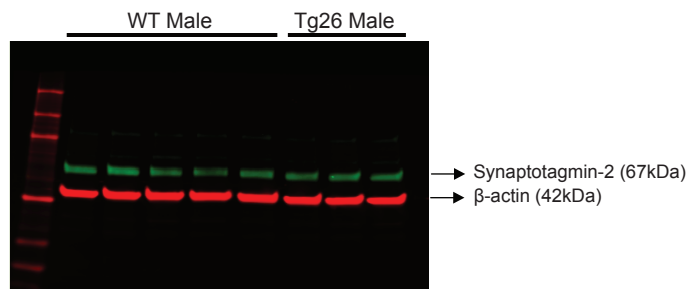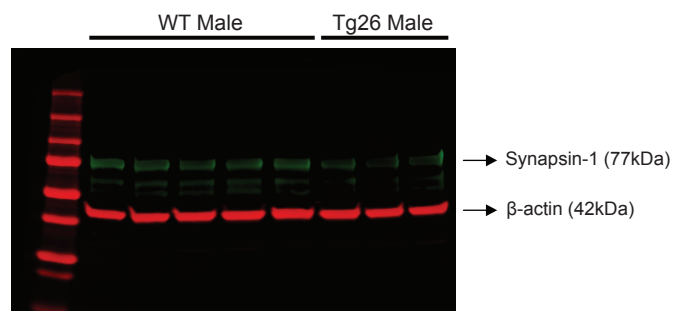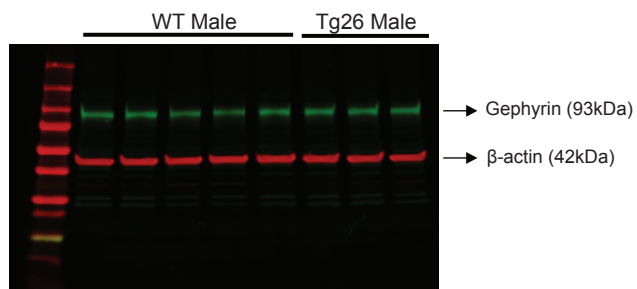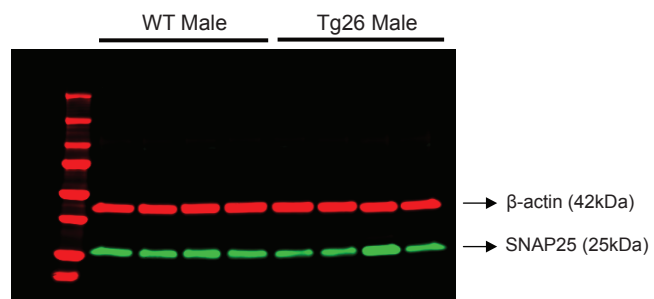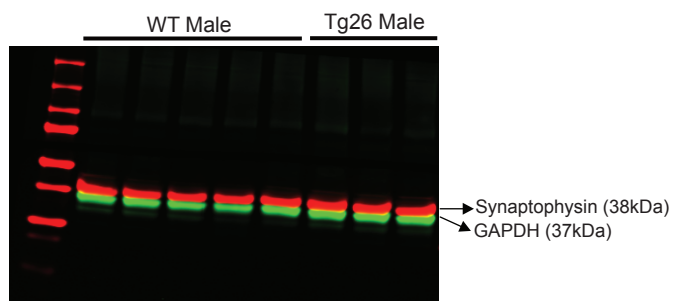

Supporting Files (Western blot) - Figure 5A

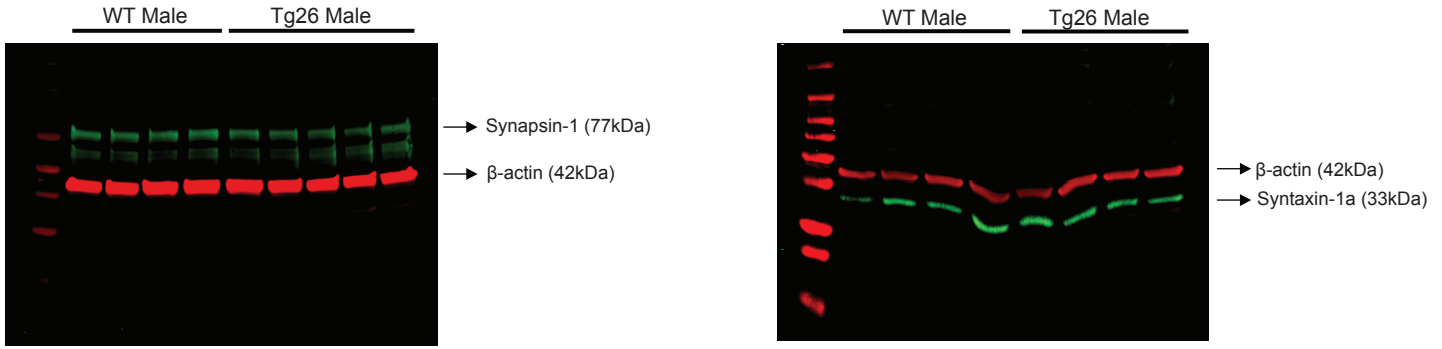

Supporting Files (Western blot) - Figure 5B

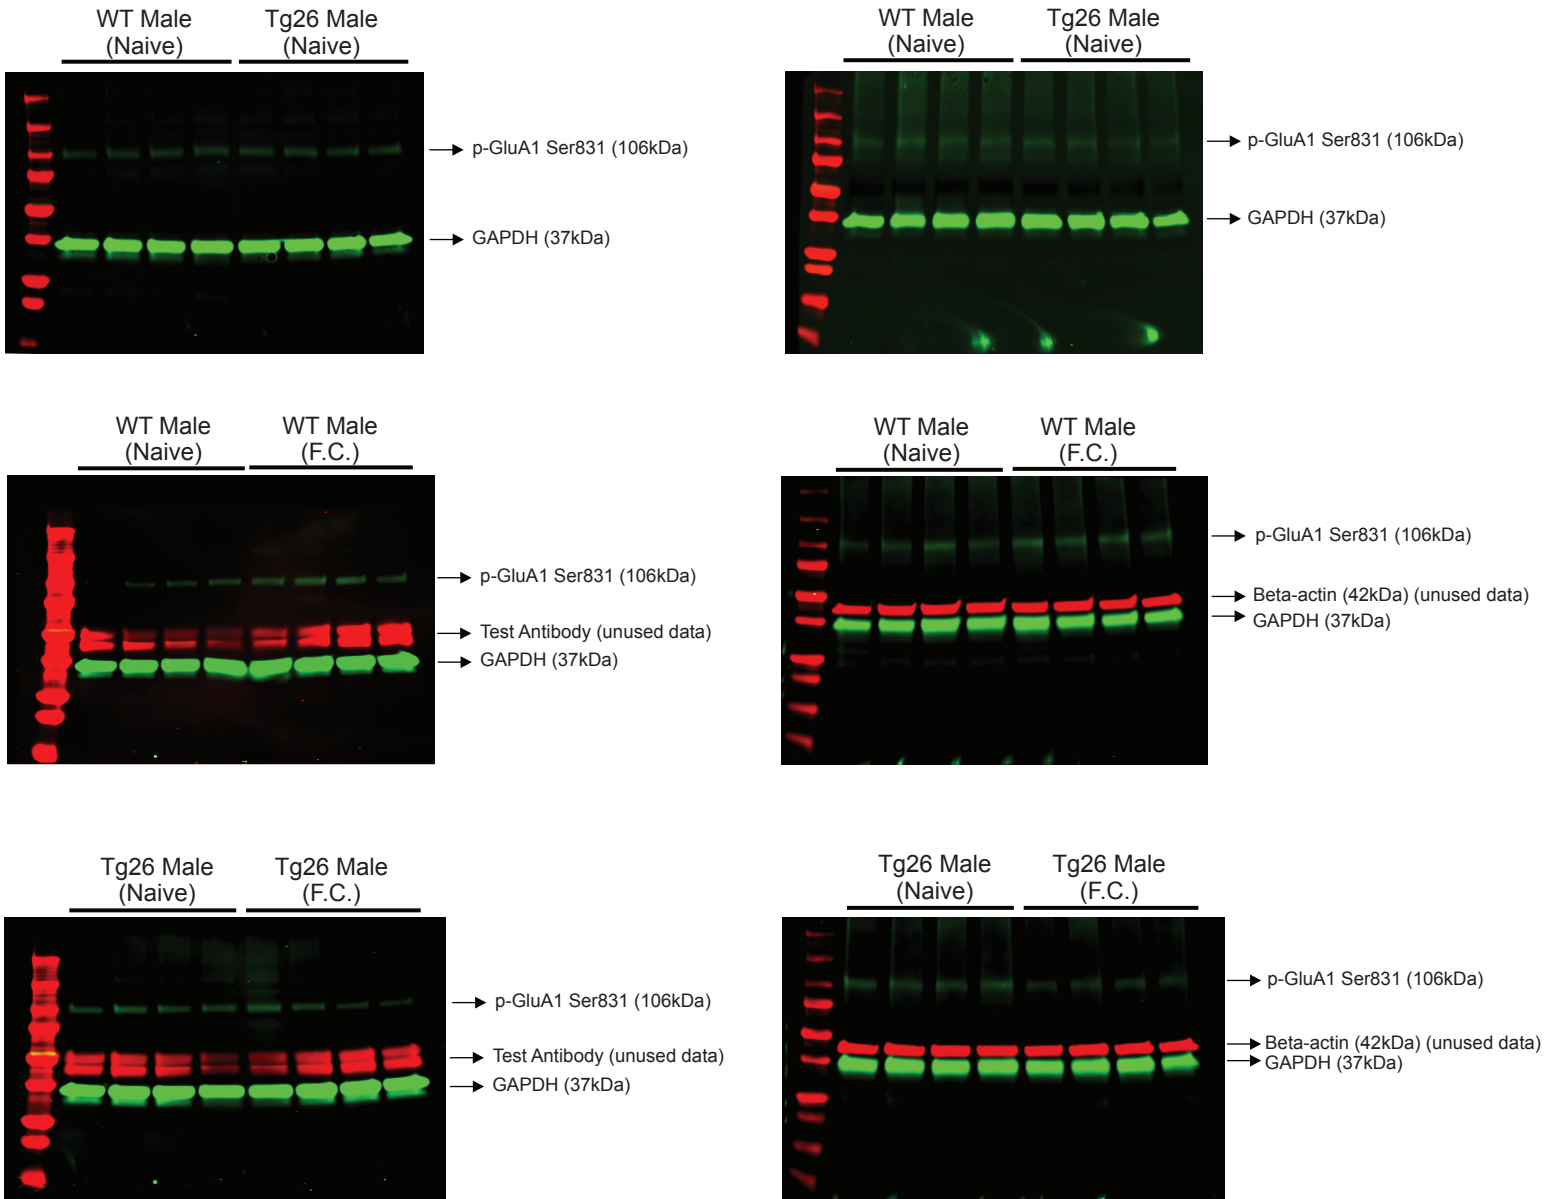

Supporting Files (Western blot) - Figure 5C

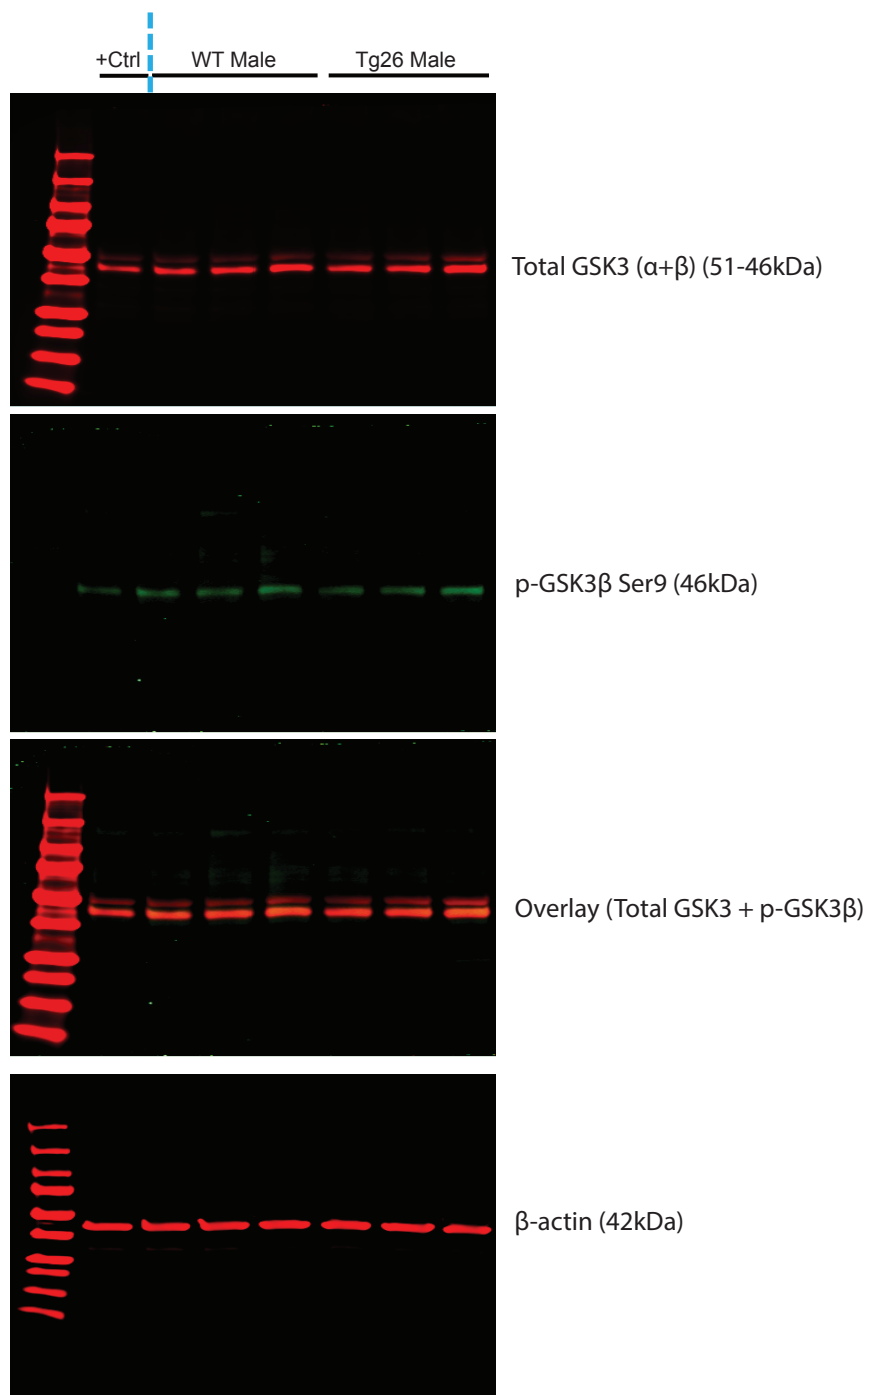

Notes:

- Lane 2: Microglial cell line BV2 was used as positive (+ve) control for GSK3 detection.

Supporting Files (Western blot) - Figure 5C

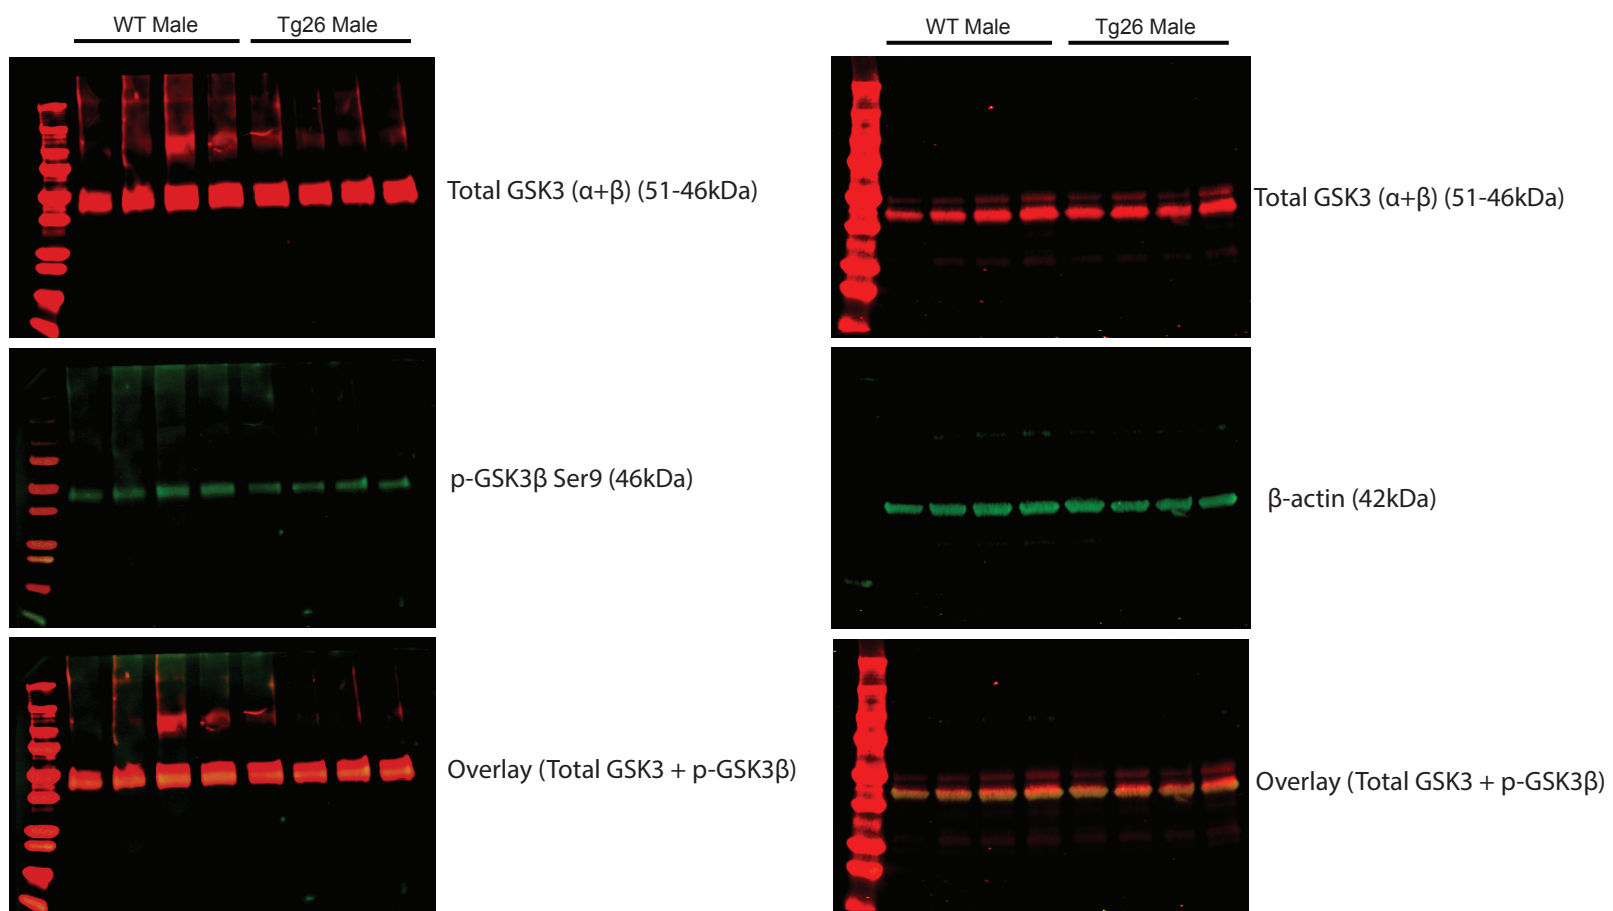

Notes:

The alpha and beta isoforms of total GSK3 (top left panel) did not separate well.

The same samples were run again (the gel on the right) and stained with total GSK3 and beta actin.

Supporting Files (Western blot) - Figure 6A

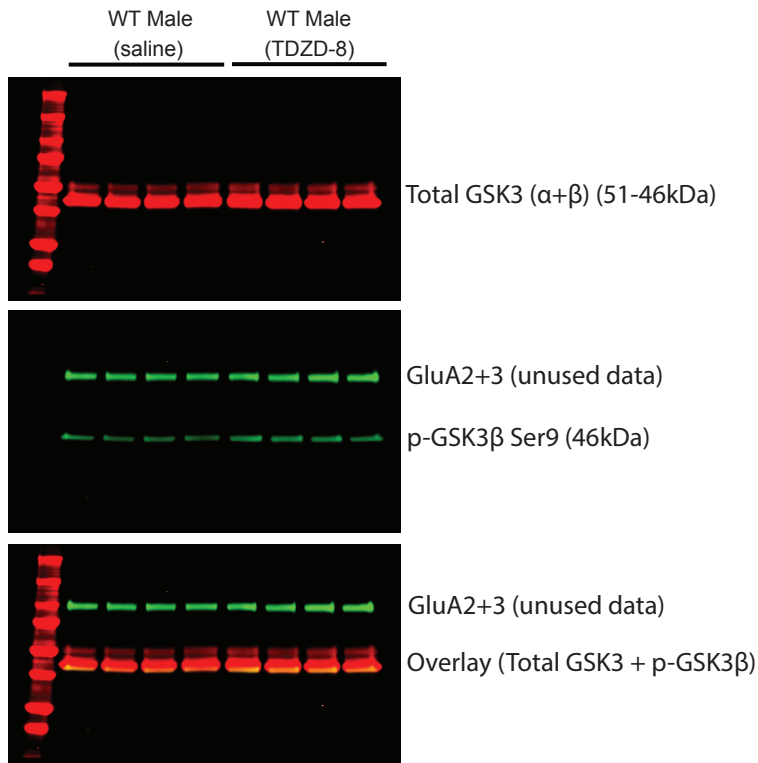

Reprobed with anti-GAPDH antibody

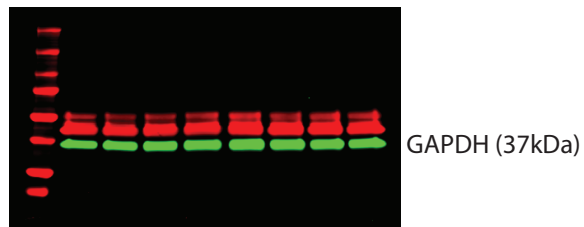

Low exposure for Green channel

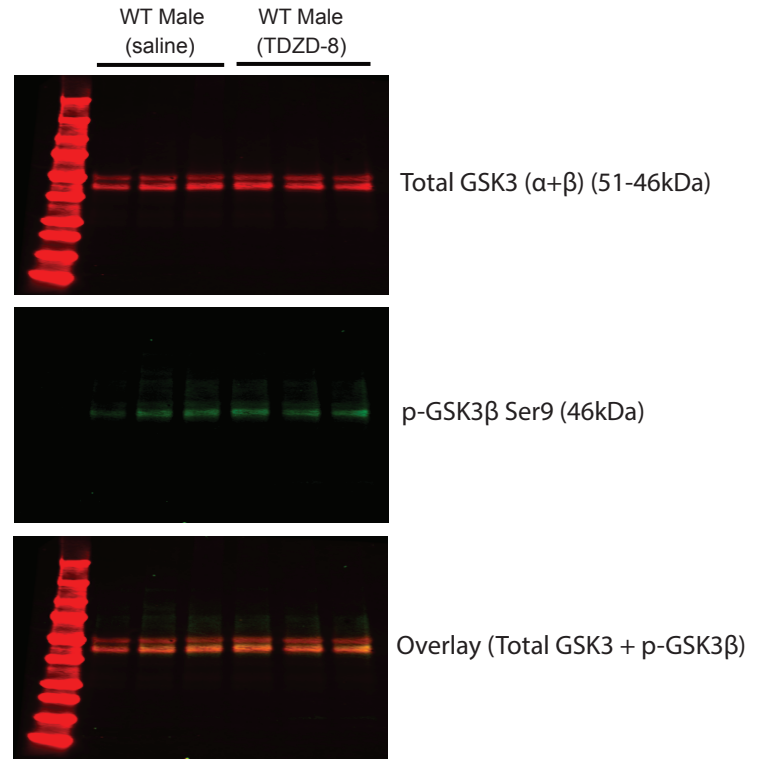

Reprobed with anti-GAPDH antibody

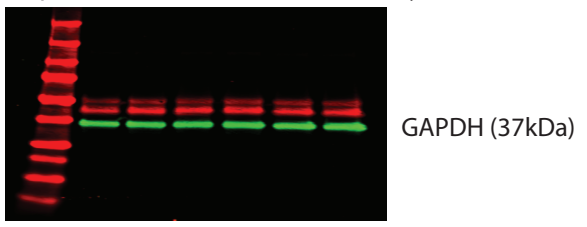

Low exposure for Green channel



Supporting Files (Western blot) - Figure 6A

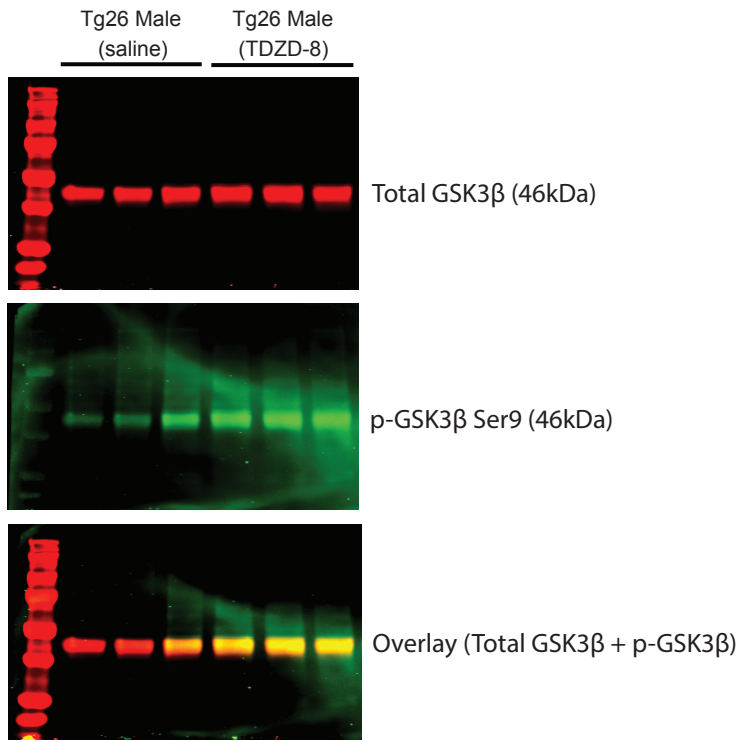

Reprobed with anti-GAPDH antibody

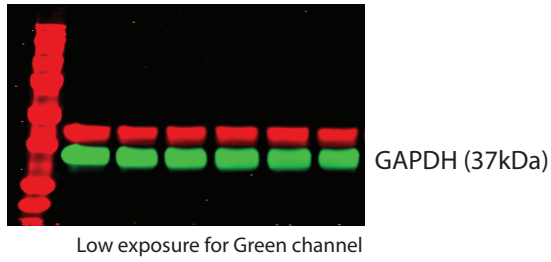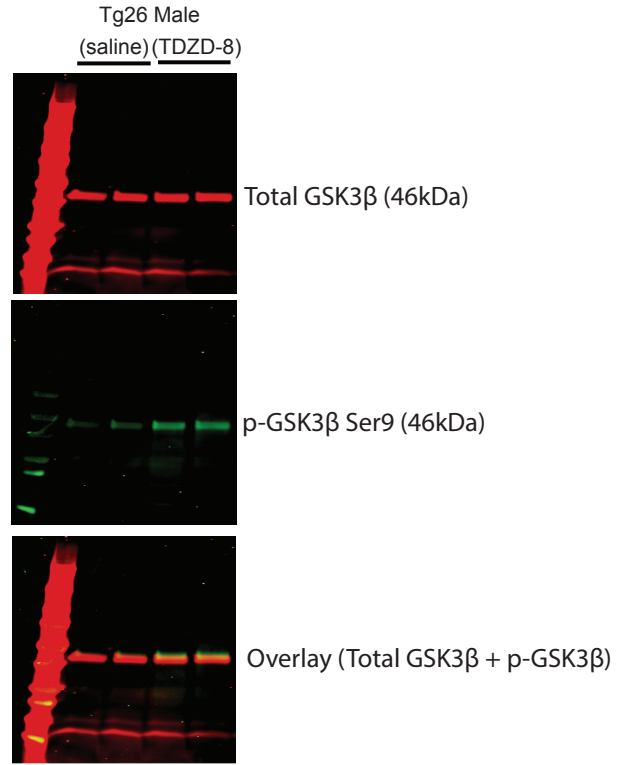

Reprobed with anti-GAPDH antibody

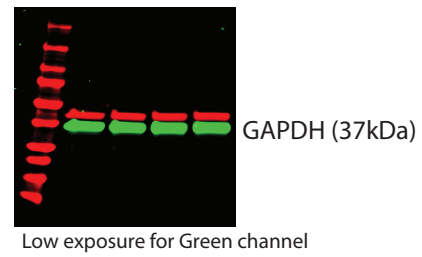

Supporting Files (Western blot) - Figure 6B

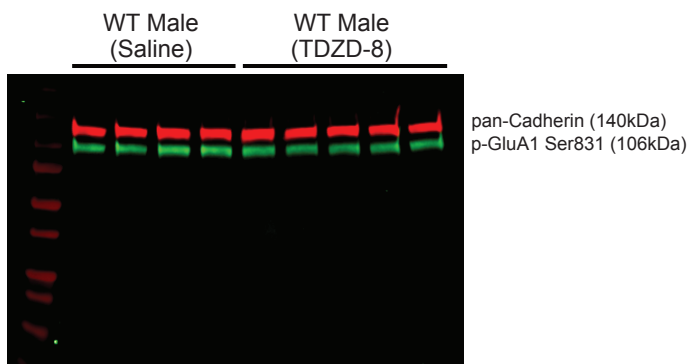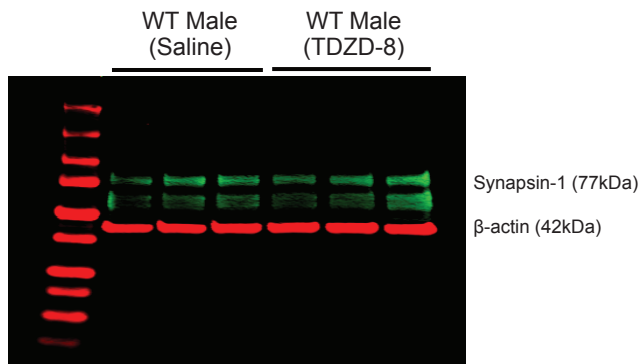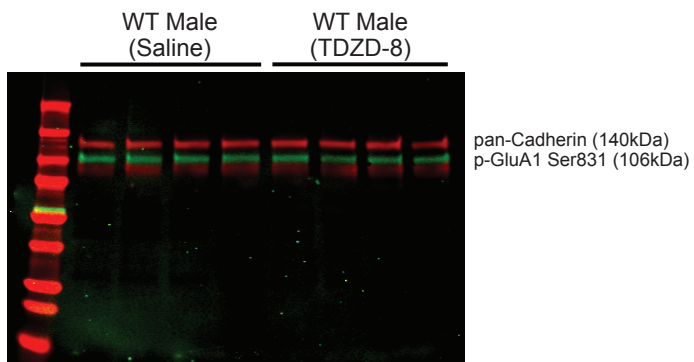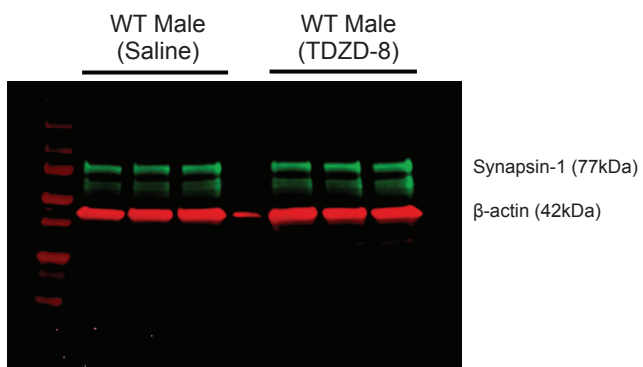

Supporting Files (Western blot) - Figure 6B

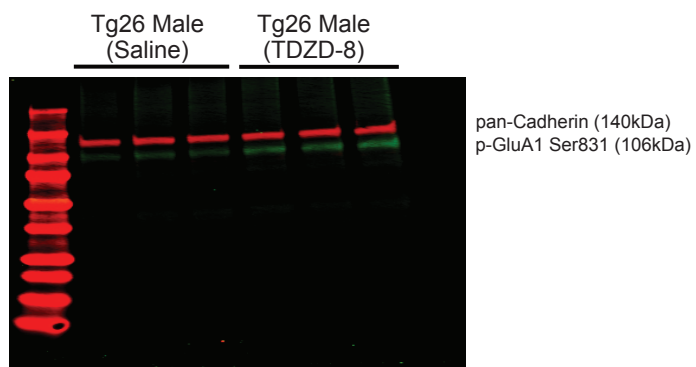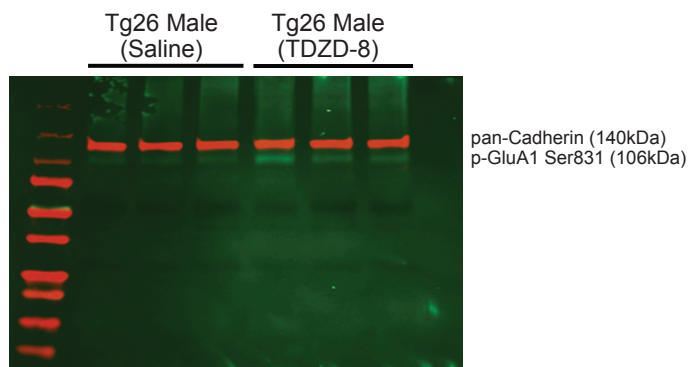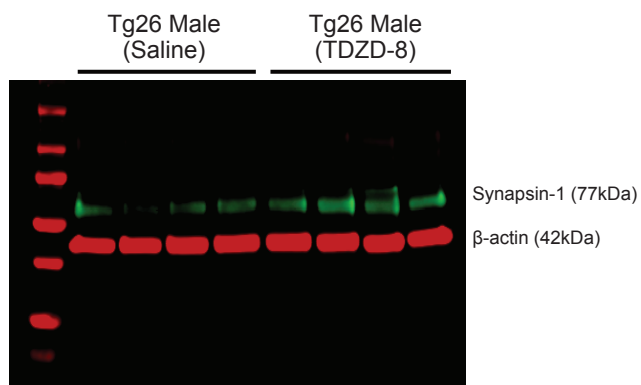

Supplement: BPH-177-5658-s001.pdf [file BPH-177-5658-s001.pdf]
